# Supplementary material for: IKKα inactivation promotes Kras-initiated lung adenocarcinoma development through disrupting major redox regulatory pathways
Source: PubMed Central journal article supplement — Proc Natl Acad Sci U S A. 2018 Jan 8;115(4):E812–21. doi: 10.1073/pnas.1717520115 (PMC5789942; doi:10.1073/pnas.1717520115), 2018-01-08
Supplement: pnas.201717520SI.pdf [file pnas.201717520SI.pdf]

# Supporting Information

Song et al. 10.1073/pnas.1717520115

## SI Materials and Methods

**Antibodies.** The following antibodies were used for Western blot analysis and immunostaining: IKK $\alpha$  (IMG-136A), from IMG-NEX; NRF2 (sc-722), p53 (sc-6243), p21 (sc-6246), NOX2 (sc-5827), KEAP1 (sc-15246), Lamin B (sc-6216), CC10 (sc-9772), and SP-C (sc-13979), from Santa Cruz Biotechnology; p65 (8242) and p50 (12540), from Cell Signaling Technology; ubiquitin (MMS-257P) from Covance;  $\beta$ -actin (A-5441) from Sigma-Aldrich; and MDM2 (ab16895), NQO1(ab34173), p53 (ab26),  $\alpha$ -tubulin (ab4074) and 8-OHdG (ab26842), from Abcam.

**SA- $\beta$ -Gal Staining.** Here 20- $\mu$ m sections were cut from optimal cutting temperature compound (OTC)-embedded frozen tissues and then fixed in 1% formaldehyde for 1 min. Sections were incubated at 37 °C overnight in 5-bromo-4-chloro-3-indolyl- $\beta$ -D-galactosidase (X-gal) solution (0.5 mg/mL X-gal, 40 mM citric acid/sodium phosphate buffer, 5 mM potassium ferrocyanide, 5 mM potassium ferricyanide, 2 mM MgCl<sub>2</sub>, and 150 mM NaCl, pH 5.5) (1). Sections were rinsed with PBS and counterstained with Neutral Red. For cultured cells, cells were washed with PBS and fixed in 1 $\times$  Fixative Solution (included in Senescence  $\beta$ -Galactosidase Staining Kit 9860; Cell Signaling Technology) for 5 min. The cells were then incubated at 37 °C overnight with the same staining solution. Three fields were selected, and positive cells were counted.

**Measurement of ROS.** Here 20- $\mu$ m sections were cut from OCT-embedded frozen tissues and incubated with 10  $\mu$ M DCF-DA (Molecular Probes) at 37 °C for 0.5~1 h. The fluorescent signal was detected by fluorescence microscopy, and the intensity was analyzed using ImageJ software. For cultured cells, cells were washed with PBS and incubated with 10  $\mu$ M DCF-DA at 37 °C for 30 min. The fluorescent signal was detected by a fluorescence microscope or analyzed on a LSR Fortessa flow cytometer (BD Biosciences).

**Treatment with NAC and Apocynin.** NAC (A7250; Sigma-Aldrich) was administered in the drinking water (10 g/L). Apocynin (acetovanillone, W508454; Sigma-Aldrich) was administered in the drinking water (0.25 g/L) or injected i.p. (100 mg/kg) three times a week. NAC and apocynin supplementation did not affect body weight or food and water intake. For apocynin treatment, both control and apocynin drinking water contained 1.5% ethanol.

**Establishment of Kras-CL and Kras<sup>IKK $\alpha$ L</sup> Cell Lines.** Fresh lung tumors from Kras<sup>G12D</sup> mice were minced and enzymatically digested with trypsin for 1 h at 37 °C. Cells were further disaggregated by pipetting and serial filtration. Single-cell suspensions were placed on culture dishes in RPMI medium 1640 supplemented with 10% serum and 2 mM L-glutamine; these cells were then designated Kras-CL cells. Kras-CL cells were injected intratracheally into C57BL/6 mice. At 3 mo after injection, the lung tumors from these mice were used to establish another cell line, named Kras<sup>IKK $\alpha$ L</sup>, in vitro. Cultured cells were transfected with siRNA (SR417771 for mouse IKK $\alpha$ , SR417549 for mouse NOX2, SR407874 for mouse NQO1, SR427248 for mouse NRF2, and SR30004 for nontargeting siRNA; OriGene) using transfection reagents (Lipofectamine RNAiMAX; Invitrogen). Reintroduction of IKK $\alpha$ , IKK $\alpha$ -KA, or IKK $\alpha$ - $\Delta$ LZ was performed in Kras-CL cells using Lipofectamine 2000 (Invitrogen). The truncated IKK $\alpha$ - $\Delta$ LZ ( $\Delta$ aa 411–531) expression vector was generated by PCR and subcloned into the pcDNA vector. The

generated vector was verified by sequencing. To compare tumorigenic capabilities, WT mice were injected intratracheally with  $5 \times 10^6$  of Kras-CL or Kras<sup>IKK $\alpha$ L</sup> cells and then euthanized at 1.5 mo after injection. In athymic nude mice, cells ( $5 \times 10^6$ ) were injected s.c. into both flanks and euthanized at 2–3 wk after injection. Tumor volume (mm<sup>3</sup>) was calculated with the following formula: (long-axis  $\times$  short-axis<sup>2</sup>)/2.

**Mutation Analysis for IKK $\alpha$ .** Total RNA was isolated from cell lines or tumor tissues, and cDNAs from these samples were synthesized. The PCR fragments were generated with primers (mouse *Ikka* C-terminal region: 5'-CCCCTCCAGTATCAGCATGG-3' and 5'-GGCACAAAAGTCCAACCCCT-3'). For *Ikka* mutation analysis, the PCR products were subcloned into a TOPO TA vector (Invitrogen) and sequenced. The sequences were compared with those at the National Center for Biotechnology Information.

**Detection of LOH of *Ikka* Gene in Mouse Lung Tumors.** Paraffin-embedded lung tissues from Kras<sup>G12D</sup>; *Ikka*<sup>+/-</sup> mice were cut into 20- $\mu$ m-thick sections. To extract genomic DNA, lung tumor areas from lung tissue sections were trimmed, deparaffinized using xylene/ethanol, and then incubated in lysis buffer (50 mM Tris-HCl, 10 mM EDTA, 1% Tween 20, and 200  $\mu$ g/mL fresh proteinase K) as described previously (2). To determine LOH of the *Ikka* gene, genomic DNA was amplified by PCR with the following primers included: *Ikka* WT allele, 5'-CAGTCATCAGACTTGGTATCAGGC-3' and 5'-CCAAAGCTCCAATAATCCAGAGTGG-3'; *Ikka* knock-out (KO) allele, 5'-CAACATTAATGTGAGCGAG-3' and 5'-GGAACATGGGAGTATTTGG-3' (12).

**Intratracheal Injection of Ad.Cre-GFP.** Kras<sup>G12D</sup> mice with a C57BL/6 background were crossed with *Ikka*<sup>KA/KA</sup>, *Ikka*<sup>fl/fl</sup>, and *Ikka*<sup>+/-</sup> mice with a C57BL/6 background. At age 6–8 wk, the mice were intratracheally treated with  $2.5 \times 10^7$  PFU of Ad.Cre-GFP (3). The Ad.Cre was generated by the Viral Technology and Molecular Detection Groups, Protein Expression Laboratory, Frederick National Laboratory for Cancer Research.

**Detection of Cre-Mediated Recombination.** Genomic DNA was prepared from tissues or cells. PCR analysis was performed with the *Kras* primers, including 5'-GTCTTTCCCCAGCACAGTGC-3', 5'-CTCTGCTACGCCACCAGCTC-3', and 5'-AGCTAGCCAC-CATGGCTTGAGTAAGTCTGCA-3', to amplify the WT *Kras* (~622 bp) and recombined Kras<sup>G12D</sup> allele (~650 bp). Primer information was obtained from the laboratory of Tyler Jacks ([https://jacks-lab.mit.edu/protocols/genotyping/kras\\_cond](https://jacks-lab.mit.edu/protocols/genotyping/kras_cond)). For genotyping of the Cre-deleted *Ikka* allele, PCR primer sequences were 5'-CTTTGCCATCATCTCTCCGGTTTGTA-3' and 5'-CAATAGGATAATCACTAAGCACAGT-3' (1.2 kb, WT allele; 460 bp, Cre-deleted *Ikka* allele).

**IHC, IF Staining, and Lung Tumor Burden.** The Histology and Tissue Core Facility at the Frederick National Laboratory for Cancer Research routinely prepared paraffin sections of mouse organs and performed hematoxylin and eosin (H&E) staining and IHC staining for Ki67 and K5. To assess lung tumor burden, lung tumor areas were quantified by ImageJ software in H&E-stained lung sections and displayed in a bar graph as percentage occupied of total lung area. IF staining for SP-C, CC10, and 8-OHdG was performed on paraffin sections as described previously (4). In brief, paraffin sections were incubated with antibodies against SP-C, CC10, and 8-OHdG overnight at 4 °C, then washed and

stained with the fluorescence-conjugated secondary antibodies for 1 h at room temperature. Finally, the sections were mounted with DAPI (Invitrogen) mounting medium. IF staining was visualized and the cells were photographed under a fluorescence microscope (Nikon Eclipse E800).

**Cell Culture and siRNA Knockdown of Gene Expression.** Human lung ADC cell line A549 was maintained in RPMI medium 1640 supplemented with 10% serum and 2 mM L-glutamine. Cultured cells were transfected with siRNA (20 nM; SR300826 for human IKK $\alpha$ ; SR300136 for human AhR; SR30004 for nontargeting siRNA; OriGene) using transfection reagents (Lipofectamine RNAiMAX; Invitrogen).

**Western Blot Assay and IP.** Cell lysates or protein extracts from tissues were applied to an acrylamide gel, and the levels of protein expression were measured by Western blot analysis with specific antibodies, as described previously (4). In brief, a lysate (10–50  $\mu$ g) was dissolved in a protein gel-loading buffer (Bio-Rad), heated for 5 min at 95  $^{\circ}$ C, and then resolved using 7–12% SDS/PAGE. The separated proteins were transferred to a PVDF membrane (Immobilon-P; EMD Millipore), blocked in 5% nonfat milk, and analyzed using the indicated primary and secondary antibodies. Proteins were detected using a chemiluminescence reagent (PerkinElmer). For IP, the cell lysate (200  $\mu$ g) was incubated overnight with an anti-AhR or an anti-IKK $\alpha$  antibody and 30  $\mu$ L of protein A/G beads. The pellet was then washed four times in a lysis buffer. The immunoprecipitates were subjected to SDS/PAGE for Western blot analysis with the indicated antibodies.

**Preparation of Nuclear Protein.** The cells were washed twice with cold PBS and were collected by spinning at 600  $\times$  g for 5 min. Then 200–500  $\mu$ L of cytoplasmic extract buffer (10 mM KCl, 10 mM Hepes pH 7.9, 3 mM MgCl<sub>2</sub>, and 1.0% Nonidet P-40) was added to the cell pellets. The pellets were gently mixed, kept on ice for 5 min, and then centrifuged at 800  $\times$  g for 5 min. The supernatants were collected as the cytoplasmic extract. The pellets were washed once with 500  $\mu$ L of cytoplasmic extract buffer, suspended in 100–200  $\mu$ L of nuclear extract buffer (400 mM KCl, 10 mM Hepes pH 7.9, 3 mM MgCl<sub>2</sub>, and 1.0% Nonidet P-40), gently mixed on ice for 5 min, and centrifuged at 10,000  $\times$  g for 5 min. The supernatants were collected as the nuclear extract.

**RT-PCR and Quantitative Real-Time PCR.** Total RNA was isolated from the lung tissues or cells using Trizol reagent (Invitrogen). The cDNA was synthesized with the Tectro cDNA synthesis kit (Bioline). For conventional PCR, primers included the following: human Nox2, 5'-GCTGTTCAATGCTTGTGGCT-3' and 5'-TCTCCTCAT-CATGGTGACA-3'; human Gapdh, 5'-CCACCCATGGCAAATCCATGGCA-3' and 5'-TCTAGACGGCAGGTCAGGTCCACC-3'; mouse Nox2, 5'-CAGGAGTCCAAGATGCCTG-3' and 5'-GATTGGCCTGAGATTCATCC-3'; and mouse Gapdh, 5'-GCAGTGGCAAAGTGGAGATT-3' and 5'-AGAAGGGGCG-

GAGATGATGA-3'. For quantitative PCR, genes of interest were subsequently examined using TaqMan Universal PCR Master Mix and an ABI Prism 7300 Detection System (Applied Biosystems), according to the manufacturer's instructions. PCR primers included Nox2 (Cybb; PPM-32951A-200), Nrf2 (Nfe2l2; PPM24614A-200), Nqo1 (PPM03466F-200), Gpx2 (PPM04403B-200), and Gapdh (PPM02946E-200) for mouse, and Nox2 (PPH10407A-200), Nrf2 (PPH0607A-200), Nqo1 (PPH01546C-200), and Gapdh (PPH72843A-200) for human, all from SABioscience. Gene expression was normalized to the level of the *Gapdh* housekeeping gene. Data were analyzed by the  $\Delta\Delta$ Ct method and expressed as fold change in mRNA expression relative to control values.

**ChIP Assay.** The ChIP assay was performed following the instructions of the kit (17-295; EZ-ChIP; EMD Millipore). Cells were cross-linked with 1% formaldehyde and then lysed and sonicated on ice to generate DNA fragments with an average length of 200–800 bp. After preclearing, 1% of each sample was saved as an input fraction. Immunoprecipitation was performed using antibodies against IKK $\alpha$  (M280; Santa Cruz Biotechnology), AhR (H-211; Santa Cruz Biotechnology), NRF2 (C-20; Santa Cruz Biotechnology), trimethyl-H3-K9 (07-442; Upstate Biotechnology), Dnmt3a (ab2850; Abcam), and suv39H1 (05-615; EMD Millipore). DNA was eluted and purified from complexes, followed by PCR amplification of the target promoters using primers of human Nox2: 5'-CAGATTGGTCCCAAACCTCCT-3' and 5'-TTGGCCAATGATGAACCAC-3'; mouse Nox2: 5'-CAATCTTTGTGCCCATCTT-3' and 5'-CTGTACAGAGCCATTTCCA-3'; and mouse Nrf2: 5'-CAGCTGCTAATCTCTAGCAAGG-3' and 5'-CCAGTGGAAAGGAGCAAGAG-3'.

**Microarray Analysis.** Total RNA was isolated from lung tissues of WT, *Kras*<sup>G12D</sup>, and *Kras*<sup>G12D</sup>;*Ikka*<sup>ΔLu</sup> mice and from *Kras*-CL and *Kras*<sup>IKK $\alpha$ L</sup> mouse ADC cells using Trizol reagent (Invitrogen). RNA quality was examined on a Bioanalyzer (Agilent) and then analyzed on the Affymetrix GeneChip Mouse Genome 430 2.0 array at the Laboratory of Molecular Technology, Frederick National Laboratory for Cancer Research. Microarray results (accession nos. GSE84159 and GSE84163) have been deposited at the National Center for Biotechnology Information's Gene Expression Omnibus (<https://www.ncbi.nlm.nih.gov/geo/>).

**Quantification and Statistical Analysis.** Statistical analyses were performed using GraphPad Prism software. Statistical significance was determined by the *t* test, Mantel–Cox log-rank test, and Fisher's exact test, as indicated in the figure legends. *P* < 0.05 was considered to indicate statistical significance, and the error bars represent SD.

**Data and Software Availability.** The microarray analyses for mouse lung tissues (accession no. GSE84159) and mouse lung ADC cells (accession no. GSE84163) have been deposited at the National Center for Biotechnology Information's Gene Expression Omnibus (<https://www.ncbi.nlm.nih.gov/geo/>).

1. Debacq-Chainiaux F, Erusalimsky JD, Campisi J, Toussaint O (2009) Protocols to detect senescence-associated beta-galactosidase (SA-beta-gal) activity, a biomarker of senescent cells in culture and in vivo. *Nat Protoc* 4:1798–1806.

2. Liu B, et al. (2006) A critical role for I kappaB kinase alpha in the development of human and mouse squamous cell carcinomas. *Proc Natl Acad Sci USA* 103:17202–17207.

3. DuPage M, Dooley AL, Jacks T (2009) Conditional mouse lung cancer models using adenoviral or lentiviral delivery of Cre recombinase. *Nat Protoc* 4: 1064–1072.

4. Xiao Z, et al. (2013) The pivotal role of IKK $\alpha$  in the development of spontaneous lung squamous cell carcinomas. *Cancer Cell* 23:527–540.

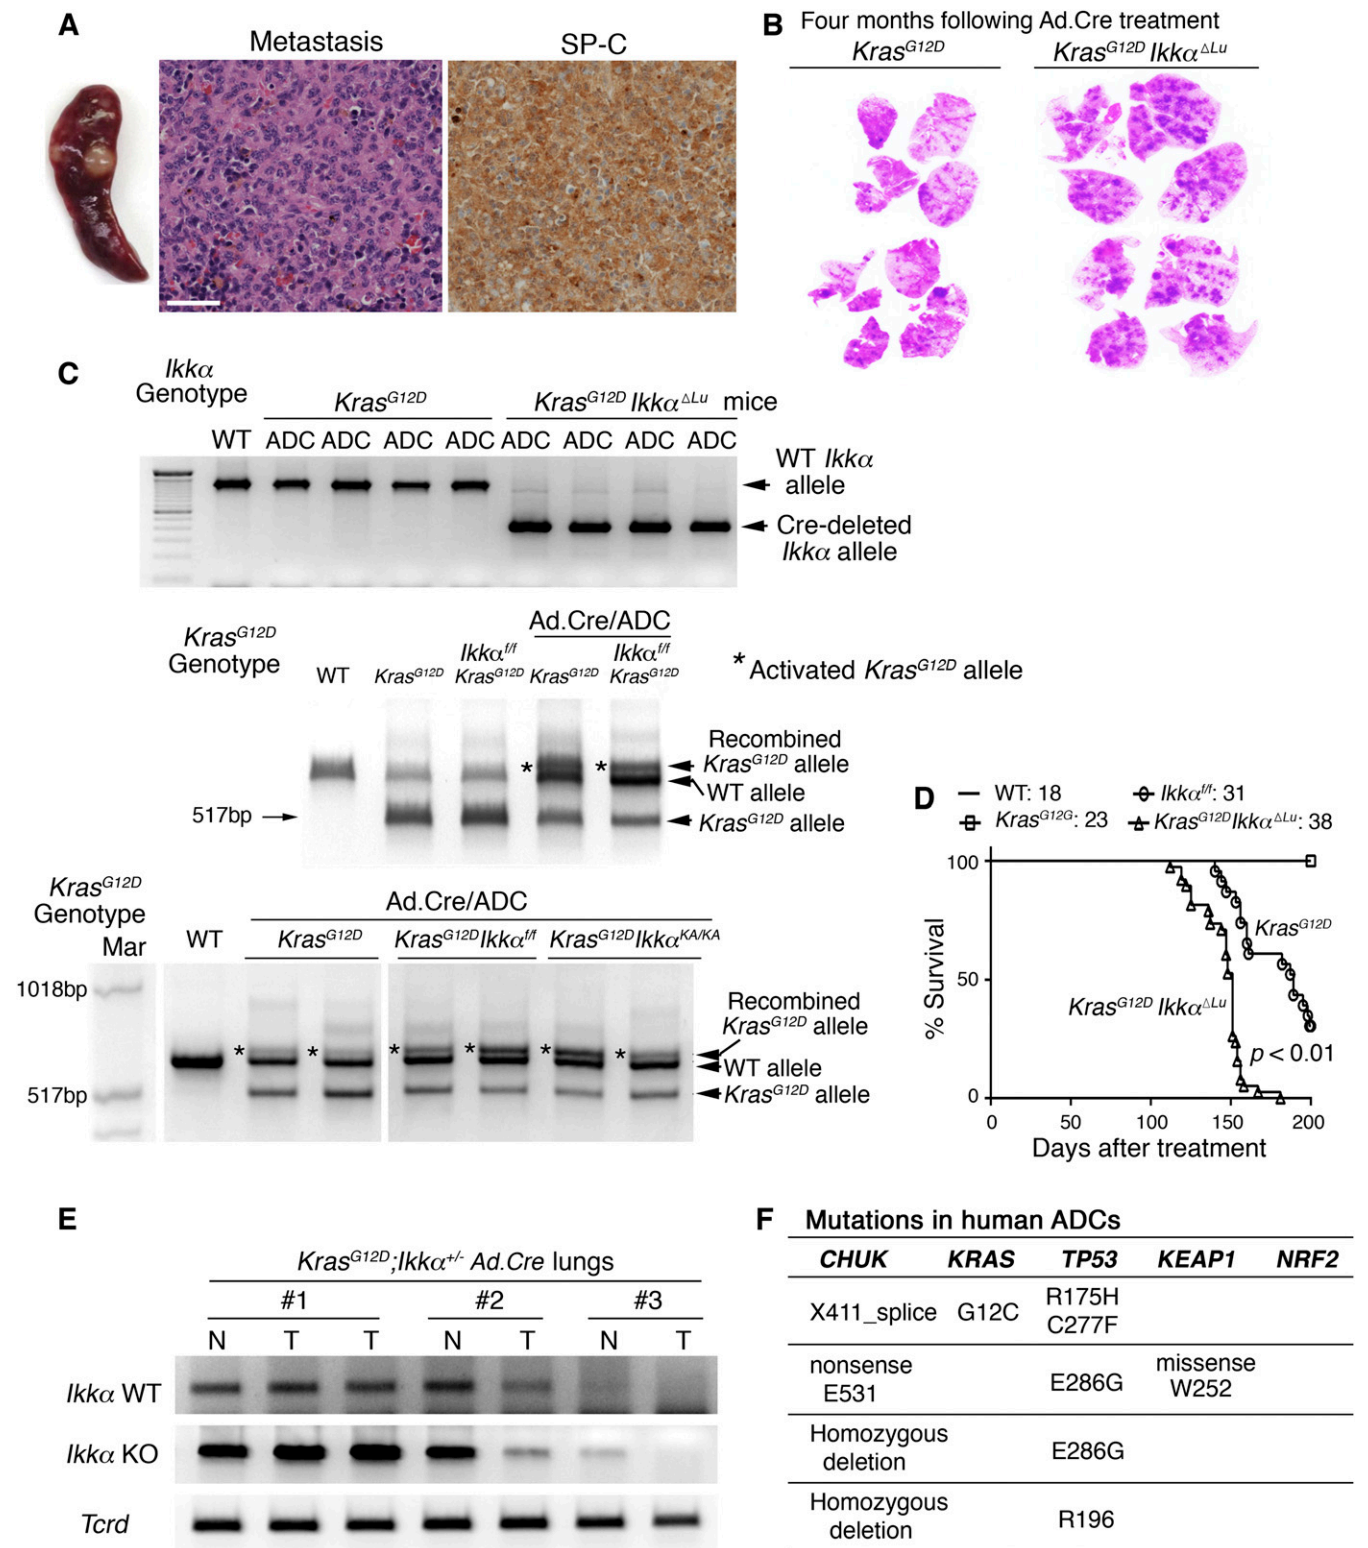

**Fig. S1.** *Ikkα* deletion in ADCs causes and promotes lung ADC. (A) Splenic metastasis of *Ikkα*<sup>ΔLu</sup> lung ADC was stained with H&E and analyzed by IHC for SP-C. (Scale bar: 25 μm.) (B) Comparison of ADC spots in H&E-stained histological slides in lungs of *Kras*<sup>G12D</sup> and *Kras*<sup>G12D</sup>; *Ikkα*<sup>ΔLu</sup> mice at 4 mo after Ad.Cre treatment. (C) Genotyping of activated *Kras*<sup>G12D</sup> alleles in *Kras*<sup>G12D</sup>, *Kras*<sup>G12D</sup>; *Ikkα*<sup>ΔLu</sup>, and *Kras*<sup>G12D</sup>; *Ikkα*<sup>KA/KA</sup> lung ADCs and genotyping of *Ikkα* ablation in *Kras*<sup>G12D</sup>; *Ikkα*<sup>ΔLu</sup> lung ADCs using gene-specific PCR primers. In row 3, there are two splices (spaces) between lane 1 and lane 2 and between lane 4 and lane 5 because these results were obtained from two different gels. (D) Survival curves of 38 *Kras*<sup>G12D</sup>; *Ikkα*<sup>ΔLu</sup> mice and 23 *Kras*<sup>G12D</sup> mice. Data were statistically analyzed using the Mantel-Cox log-rank test. \*\*\**P* < 0.001. (E) Genotyping of WT *Ikkα* and *Ikkα* KO alleles with PCR. *Tcrd* served as a DNA-loading control. T, ADC; N, adjacent tissue to ADCs. (F) *KRAS*, *TP53*, *KEAP1*, and *NRF2* mutations identified in human lung ADCs carrying *CHUK* mutations or deletions (Fig. 1A; [www.cbiportal.org](http://www.cbiportal.org)).







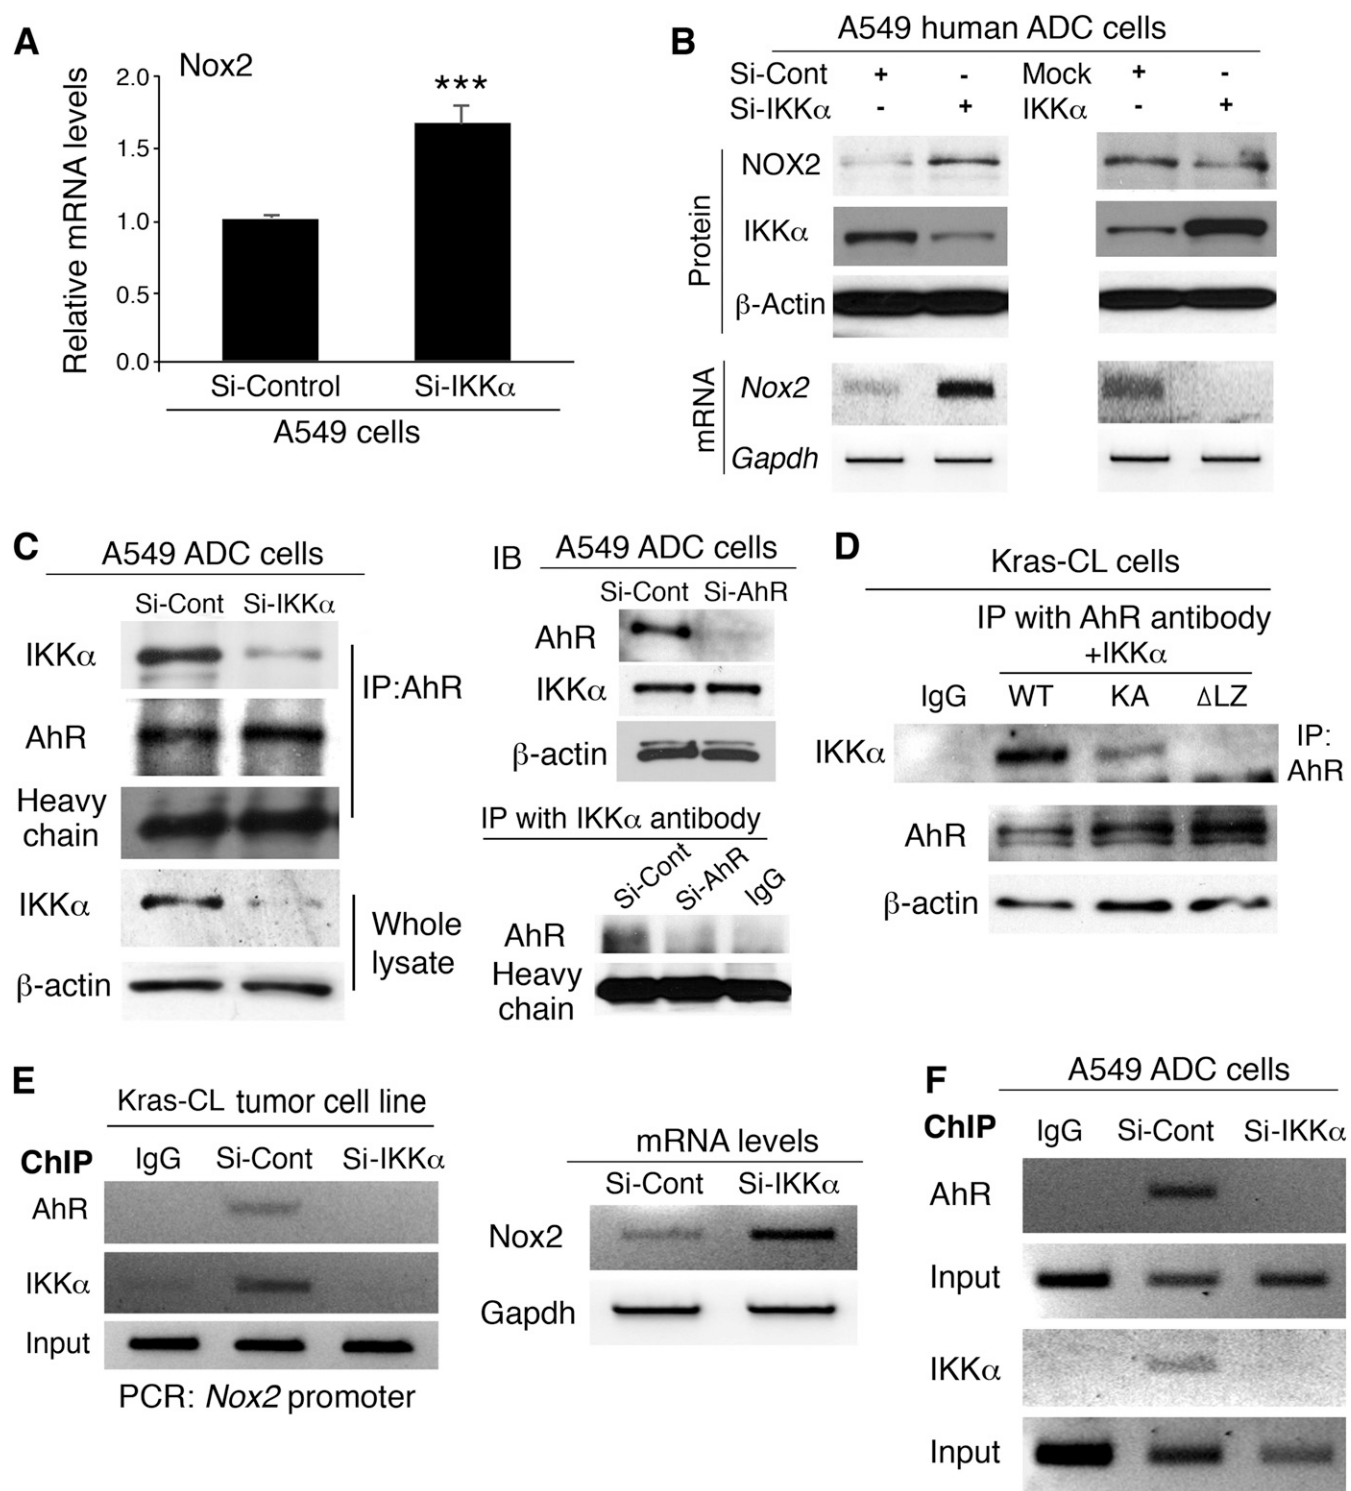

**Fig. 54.** IKK $\alpha$  deletion up-regulates Nox2 expression. (A) Knockdown of IKK $\alpha$  using Si-IKK $\alpha$  increases Nox2 expression in A549 cells ( $n = 3$ ) analyzed by RT-PCR. Data represent mean  $\pm$  SD (three repeats). \*\*\* $P < 0.001$ , Student's  $t$  test. (B) Analysis of NOX2 protein and Nox2 mRNA expression in A549 cells treated with Si-IKK $\alpha$ , Si-control, and overexpressed IKK $\alpha$ . Mock served as a control vector;  $\beta$ -actin, as a protein-loading control; Gapdh, as an mRNA-loading control. (C) IP experiment showing the interaction between AhR and IKK $\alpha$ . The immunocomplexes were gel-separated and blotted with an anti-AhR or IKK $\alpha$  antibody in A549 ADC cells.  $\beta$ -actin served as a protein-loading control. Si-Cont, control siRNA; Si-IKK $\alpha$ , siRNA for IKK $\alpha$ ; Si-AhR, siRNA for AhR. (D) IP analysis of the interaction between IKK $\alpha$  and AhR in IKK $\alpha$ -deficient Kras-CL cells overexpressing WT IKK $\alpha$ , IKK $\alpha$ -KA, or IKK $\alpha$ - $\Delta$ LZ. An anti-AhR antibody was used for IP. AhR was input;  $\beta$ -actin served as a protein-loading control. (E) ChIP analysis for IKK $\alpha$  and AhR binding to *Nox2* promoter in Kras-CL cells with anti-IKK $\alpha$  or anti-AhR antibody and PCR with primers to the *Nox2* promoter. Input, PCR control; Si-IKK $\alpha$ , siRNA against IKK $\alpha$  mRNA; Si-Cont, control (Left); Gapdh, an mRNA-loading control (Right). (F) ChIP analysis performed using anti-AhR or anti-IKK $\alpha$  antibody and PCR with *Nox2* promoter primers in A549 ADC cells. Input, a loading control.





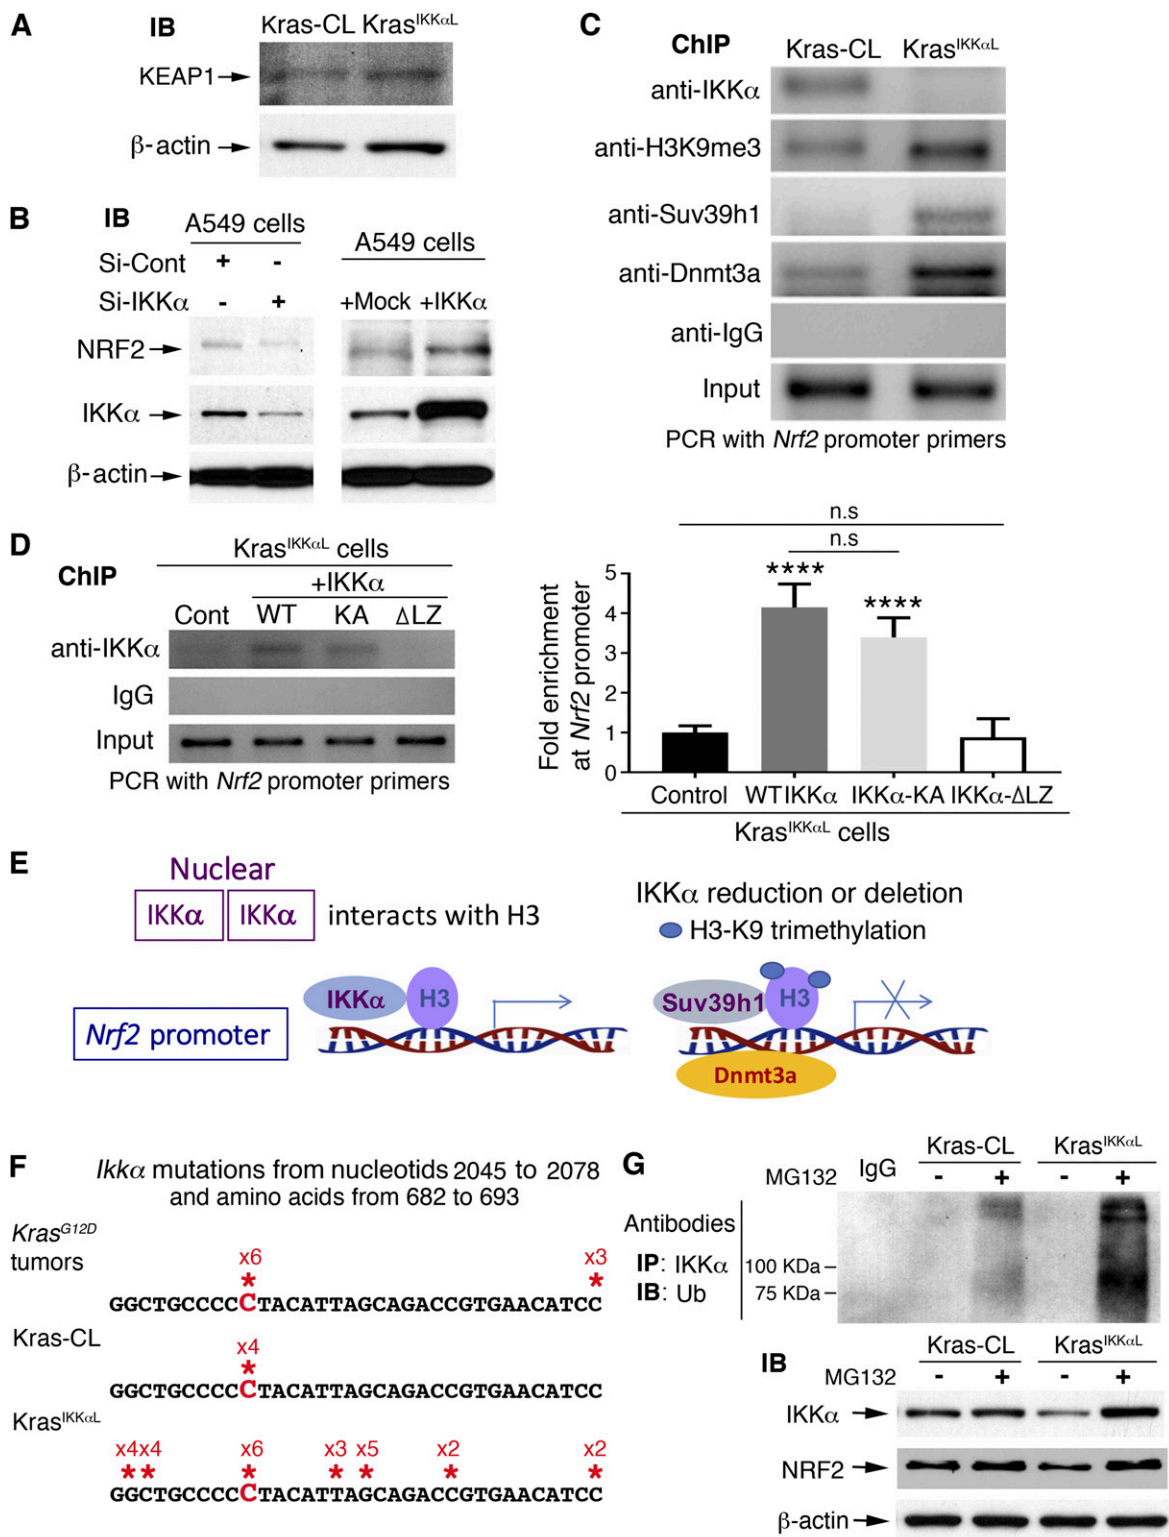

**Fig. 56.** IKK $\alpha$  regulates NRF2 expression through its promoter activity. (A) IB analysis of KEAP1 expression in Kras-CL and Kras<sup>IKK $\alpha$ L</sup> cells.  $\beta$ -actin served as a protein-loading control. (B) IB analysis of IKK $\alpha$  and NRF2 expression following treatment with Si-Cont or Si-IKK $\alpha$ , or after reexpression of IKK $\alpha$  in A549 cells. Mock, control;  $\beta$ -actin, protein-loading control. (C) ChIP assays using antibodies against IKK $\alpha$ , trimethyl-H3K9 (H3K9me3), Suv39h1, or Dnmt3a for immunoprecipitation, followed by PCR with *Nrf2* promoter primers. An anti-IgG is used as an antibody control, and the input is used as a loading control. (D, Left) ChIP analyses for IKK $\alpha$  binding to *Nrf2* promoter using an antibody against IKK $\alpha$  for IP and PCR with *Nrf2* promoter primers in Kras<sup>IKK $\alpha$ L</sup> cells (Cont, control) and Kras<sup>IKK $\alpha$ L</sup> cells overexpressing WT IKK $\alpha$ , IKK $\alpha$ -KA, or IKK $\alpha$ - $\Delta$ LZ. (D, Right) Data represent mean  $\pm$  SD (four repeats). \*\*\*\**P* < 0.0001 compared with control or IKK $\alpha$ - $\Delta$ LZ, Student's *t* test. n.s., not significant. (E) A working model for *Nrf2* promoter regulation in the presence or absence of IKK $\alpha$ . H3, histone 3; arrow, gene transcription; cross lines, block of gene transcription. (F) *Ikk $\alpha$*  mutations were identified in Kras<sup>G12D</sup>-initiated lung ADCs, Kras-CL cells, and Kras<sup>IKK $\alpha$ L</sup> cells by sequencing of IKK $\alpha$  cDNAs. Approximately 80 cDNA clones inserted into a vector from each cell line were sequenced. Red stars, mutations; numbers indicate detection frequencies of mutations. (G) IB analysis of IKK $\alpha$  expression and ubiquitination in Kras-CL and Kras<sup>IKK $\alpha$ L</sup> cells, with or without MG132 treatment to inhibit proteasomal degradation. IP was performed with an IKK $\alpha$  antibody; IB, with a ubiquitin antibody.  $\beta$ -actin served as a protein-loading control.



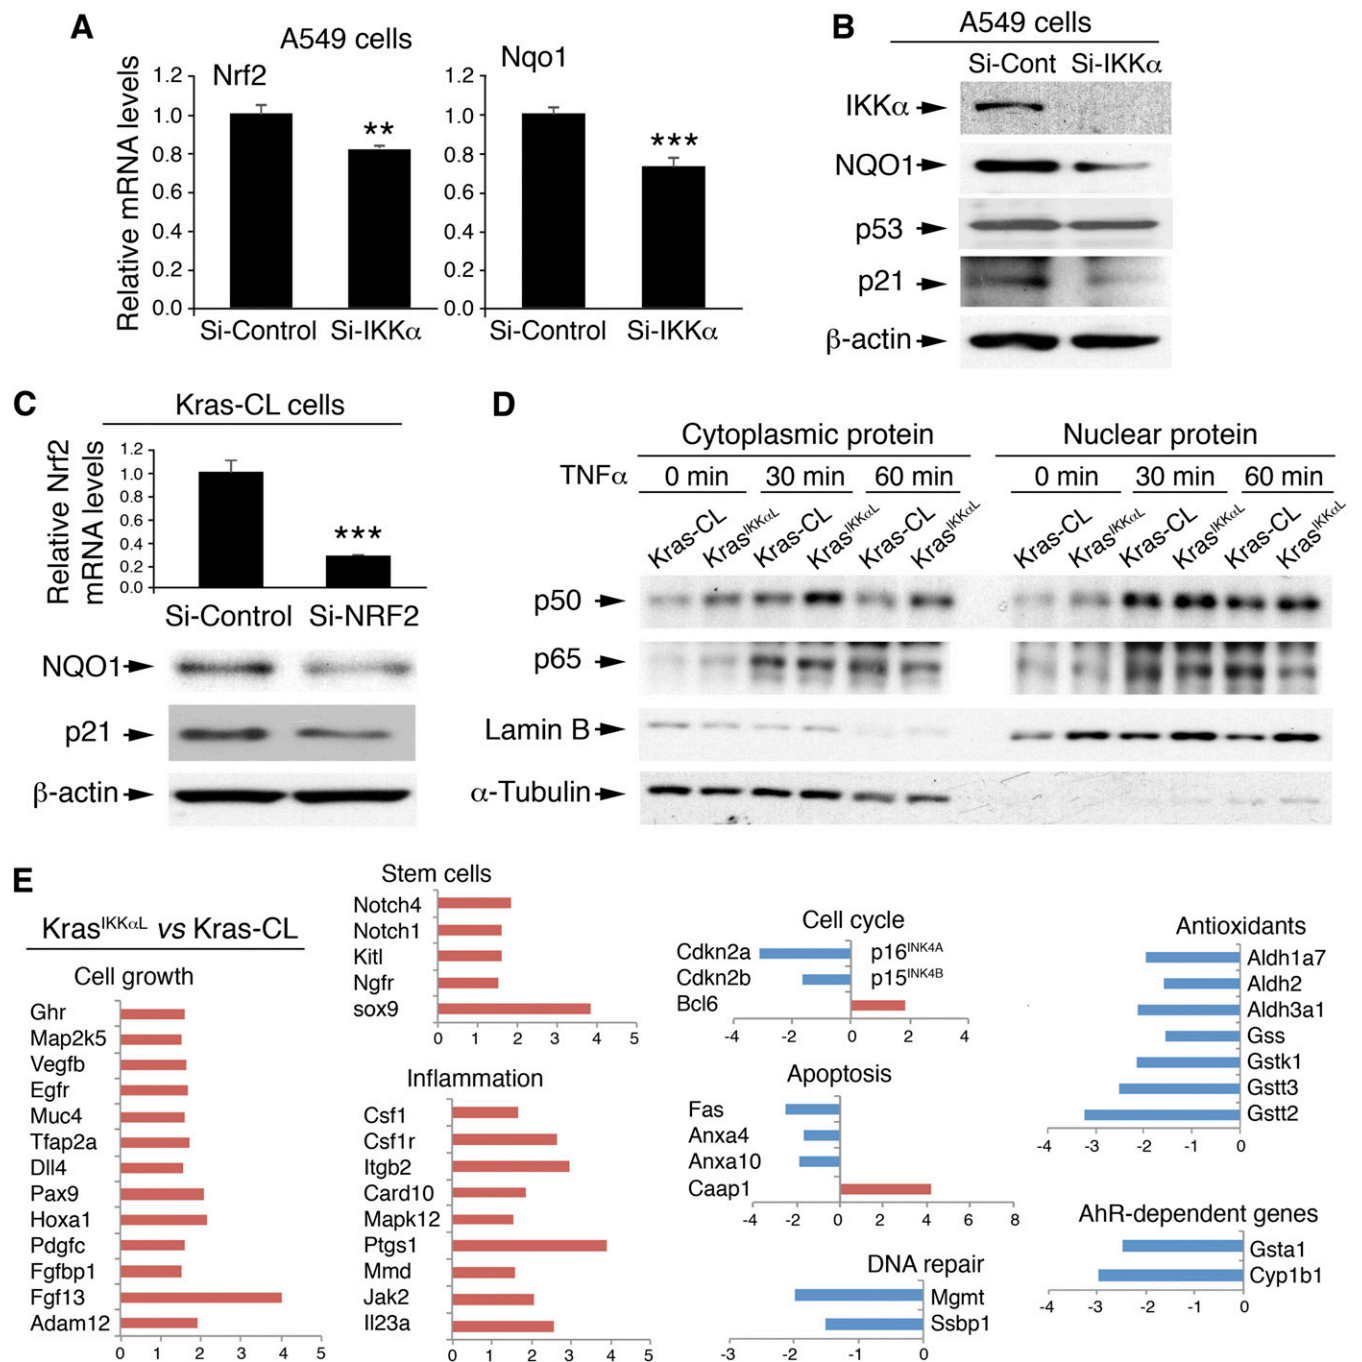

**Fig. S7.** IKK $\alpha$  up-regulates Nrf2 and Nqo1 expression. (A) RT-PCR analysis of Nrf2 and Nqo1 expression in A549 cells treated with Si-Control or Si-IKK $\alpha$  ( $n = 3$ /group). Data represent mean  $\pm$  SD (three repeats). \*\* $P < 0.01$ ; \*\*\* $P < 0.001$ , Student's  $t$  test. (B) IB analysis of NQO1, p53, and p21 expression in A549 cells treated with Si-control or Si-IKK $\alpha$ .  $\beta$ -actin served as a protein-loading control. (C) Si-RNA NRF2 decreases NRF2, NQO1, and p21 expression in Kras-CL cells.  $\beta$ -actin served as a protein-loading control. (D) IB analysis of the expression of cytoplasmic and nuclear p50 and p65 levels in Kras-CL and Kras<sup>IKK $\alpha$ L</sup> cells following TNF $\alpha$  (10 ng/mL) stimulation. Lamin B served as a nuclear protein-loading control;  $\alpha$ -tubulin, as a cytoplasmic protein-loading control. (E) Gene expression profile analysis using gene arrays in Kras<sup>IKK $\alpha$ L</sup> vs. Kras-CL cells. Red bar indicates increased expression; blue bar, decreased expression.
